# Supplementary material
Source: Springer Nature journal article supplement (https://www.springermedizin.de/resource/supplementary/12888_2013_1640_MOESM2_ESM.pdf/9481044)
Supplement: MOESM2 [file 9481044]

**IDENTIFICATION**

*N*=256 records from database searching (Search 1 and 2; Table 1)

*N*=11 studies identified through hand search

**SCREENING**

*N*=267 records after duplicates removed

*N*=267 records (titles/abstracts) screened by LTL/KKK

*N*=218 excluded

**ELIGIBILITY**

*N*=49 full-text articles assessed by LTL/KKK

*N*=18/49 (37%) articles excluded:

- *N*=6 Cannabis vs. anxiety comparison not shown
- *N*=3 Inadequate data to compute the odds ratio
- *N*=3 High comorbidity with other substances
- *N*=2 Anxiety diagnosis or severity of anxiety missing
- *N*=2 No new data (data from studies already in analysis)
- *N*=1 Healthy non-users missing
- *N*=1 Non-users missing

**INCLUDED**

*N*=31 studies included in the quantitative meta-analysis
